# Supplementary material
Source: PubMed Central journal article supplement (PMC2930403)
Supplement: NIHMS222431-supplement-supplemental_data.pdf [file NIHMS222431-supplement-supplemental_data.pdf]

## Supporting Information for Publication

### Analysis of Eight Oil Spill Dispersants Using Rapid, In Vitro Tests for Endocrine and Other Biological Activity

Richard S. Judson\*, Matthew T. Martin<sup>1</sup>, David M. Reif<sup>1</sup>, Keith A. Houck<sup>1</sup>, Thomas B. Knudsen<sup>1</sup>, Daniel M. Rotroff<sup>1</sup>, Menghang Xia<sup>2</sup>, Srilatha Sakamuru<sup>2</sup>, Ruili Huang<sup>2</sup>, Paul Shinn<sup>2</sup>, Christopher P. Austin<sup>2</sup>, Robert J. Kavlock<sup>1</sup>, David J. Dix<sup>1</sup>

<sup>1</sup>National Center for Computational Toxicology, Office of Research and Development, U.S. Environmental Protection Agency, Research Triangle Park, NC 27711; <sup>2</sup>NIH Chemical Genomics Center, National Institutes of Health, Department of Health and Human Services, Bethesda, MD 20892

#### Contents

|                                                                                      |    |
|--------------------------------------------------------------------------------------|----|
| Appendix A – Oil Spill Dispersants and Reference Chemicals .....                     | 2  |
| Appendix A.1: Oil Spill Dispersants.....                                             | 2  |
| Appendix A.2: Reference Chemicals .....                                              | 7  |
| Appendix B – Assay Protocols .....                                                   | 9  |
| Appendix B.1: Cis and Trans Transcription Factor Activity Reporter Gene Assays ..... | 9  |
| Appendix B.2: AR beta-lactamase Assay (agonist and antagonist modes).....            | 13 |
| Appendix B.3: ER beta-lactamase Assay (agonist and antagonist modes) .....           | 16 |
| Appendix C – Curve Fitting Method .....                                              | 19 |
| Appendix D – Viability Data.....                                                     | 21 |
| Appendix E – Reference Chemical Data for ER Assays .....                             | 23 |
| Appendix F – P-value Matrix for Cytotoxicity Comparison.....                         | 26 |
| References .....                                                                     | 28 |

**26 Pages**

**9 Tables**

**3 Figures**

*This document has been reviewed in accordance with U.S. Environmental Protection Agency policy and approved for publication. Mention of trade names or commercial products does not constitute endorsement or recommendation for use.*

## Appendix A – Oil Spill Dispersants and Reference Chemicals

### Appendix A.1: Oil Spill Dispersants

The eight oil spill dispersants analyzed are listed in **Table S1**. Samples were shipped directly from the manufacturers to the EPA for aliquoting and shipping to the laboratories performing assays. All of these dispersants are on the National Contingency Plan product schedule at [http://www.epa.gov/oem/content/ncp/product\\_schedule.htm](http://www.epa.gov/oem/content/ncp/product_schedule.htm). Toxicity values for aquatic species and efficacy values are also compiled by the EPA Office of Emergency Management at [http://www.epa.gov/emergencies/content/ncp/tox\\_tables.htm](http://www.epa.gov/emergencies/content/ncp/tox_tables.htm).

| Sample Name        | Sample ID | EPA ID | Volume Received | Comments          | Date Received | Manufacturer/Source                          | Lot #     | Storage      |
|--------------------|-----------|--------|-----------------|-------------------|---------------|----------------------------------------------|-----------|--------------|
| Corexit 9500       | TX000362  | G      | 1 L             | hazy yellow       | 11-May-10     | Nalco                                        | 10-May-10 | D377A/J07022 |
| JD 2000            | TX006501  | A      | 10 ml           | clear yellow      | 27-May-10     | Ethox Chemicals, LLC                         | 20C366    | D377A/J07022 |
| DISPERSIT SPC 1000 | TX006499  | B      | 10 ml           | clear amber       | 27-May-10     | Polychem                                     | NA        | D377A/J07022 |
| Sea Brat #4        | TX006500  | C      | 10 ml           | hazy yellow       | 27-May-10     | Alabaster Corp                               | NA        | D377A/J07022 |
| Nokomis 3-AA       | TX006505  | D      | 10 ml           | clear light color | 27-May-10     | MAR-LEN Supply inc.                          | NA        | D377A/J07022 |
| Nokomis 3-F4       | TX006504  | E      | 10 ml           | clear light color | 27-May-10     | MAR-LEN Supply inc.                          | NA        | D377A/J07022 |
| ZI-400             | TX006518  | H      | 25 ml           | clear yellow      | 29-May-10     | ZI Chemical                                  | NA        | D377A/J07022 |
| SAF-RON GOLD       | TX006258  | I      | 500 ml          | silver iridescent | 4-June-10     | Sustainable Environmental Technologies, Inc. | NA        | D377A/J07022 |

**Table S1** – Dispersant samples analyzed.

Corexit 9500: The major dispersant used during the 2010 oil spill incident in the Gulf of Mexico, Corexit 9500 is produced by Nalco Energy Services, L.P. (Sugar Land, Texas). The exact composition is proprietary, but some information is available from the EPA

(<http://www.epa.gov/bpspill/dispersants.html#bpdata>), the material safety data sheet (MSDS; [http://lmrk.org/corexit\\_9500\\_uscueg.539287.pdf](http://lmrk.org/corexit_9500_uscueg.539287.pdf)) and other publications. The composition listed on the MSDS is: Distillates, petroleum, hydrotreated light (CAS No. 64742-47-8) 10.0 - 30.0%, Propylene Glycol (CAS No. 57-55-6) 1.0 - 5.0% and a proprietary organic sulfonic acid salt, 10.0 - 30.0%. A publication from Exxon also mentions that Corexit 9500 contains Tween 80 (eicosethoxy sorbitan monooleate) and Span 80, (ethoxylated sorbitan mono- and trioleates)[1] both of which are surfactants. U.S. Patent 6168702 has been reported to cover the class of sulfonic acid surfactants.

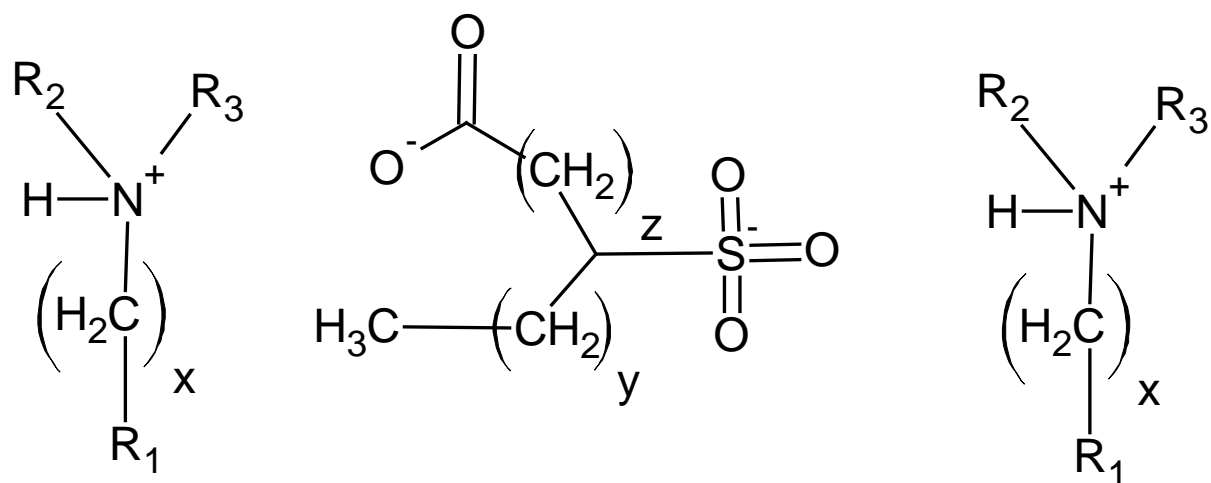

**Figure S1** – reported structure for the class of surfactants used in Corexit 9500, as reported in U.S. Patent 6168702. wherein R<sub>1</sub> is H or an alkoxide of from 5 to about 20 carbon atoms; x is an integer of from about 8 to about 22 when R<sub>1</sub> is hydrogen and from about 2 to about 5 when R<sub>1</sub> is alkoxide; R<sub>2</sub> is independently selected from the group consisting of H, (CH<sub>2</sub> CH<sub>2</sub> O)<sub>m</sub> H, and (CH<sub>2</sub> CH(CH<sub>3</sub>)O)<sub>m</sub> H; R<sub>3</sub> is independently selected from the group consisting of H, (CH<sub>2</sub> CH<sub>2</sub> O)<sub>n</sub> H, and (CH<sub>2</sub> CH(CH<sub>3</sub>)O)<sub>n</sub> H; M and n are integers from 1 to 50; and y and z are integers ranging from 2 to 10.

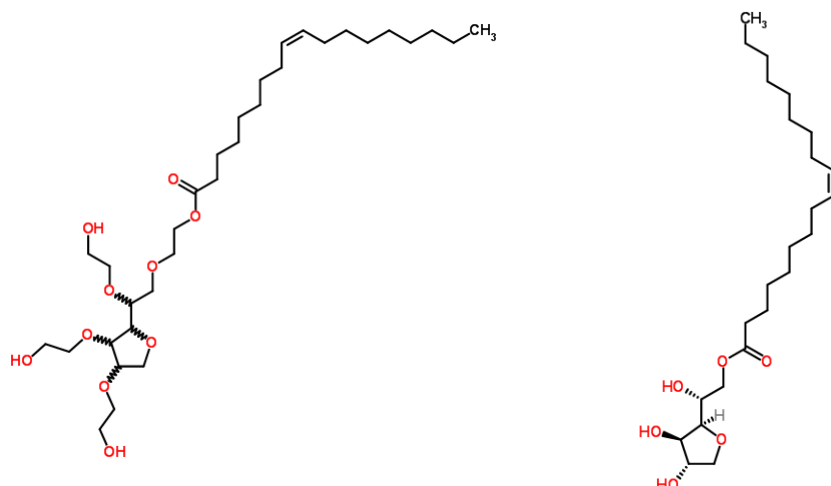

**Figure S2:** Chemical Structure of Tween 80 (Polysorbate 80, CAS No. 9005-65-6) and Span 80 (Sorbitan, mono-(9Z)-9-octadecenoate, CAS No. 1338-43-8)

| Item | CAS Registry Number | Chemical Name (TSCA Inventory)                                             |
|------|---------------------|----------------------------------------------------------------------------|
| 1    | 57-55-6             | 1,2-Propanediol                                                            |
| 2    | 111-76-2            | Ethanol, 2-butoxy-                                                         |
| 3    | 577-11-7            | Butanedioic acid, 2-sulfo-, 1,4-bis(2-ethylhexyl) ester, sodium salt (1:1) |
| 4    | 1338-43-8           | Sorbitan, mono-(9Z)-9-octadecenoate                                        |
| 5    | 9005-65-6           | Sorbitan, mono-(9Z)-9-octadecenoate, poly(oxy-1,2-ethanediyl) derivs.      |
| 6    | 9005-70-3           | Sorbitan, tri-(9Z)-9-octadecenoate, poly(oxy-1,2-ethanediyl) derivs        |
| 7    | 29911-28-2          | 2-Propanol, 1-(2-butoxy-1-methylethoxy)-                                   |
| 8    | 64742-47-8          | Distillates (petroleum), hydrotreated light                                |

**Table S2:** The following non-confidential component list for Corexit 9500 was provided by EPA at <http://www.epa.gov/bpspill/dispersants.html#bpdata>.

**JD 2000:** Manufactured by GlobeMark Resources. They provide an MSDS (<http://globemarkresources.com/JD2000.php>), but all information on the chemical including CAS No. and composition is listed as proprietary.

**DISPERSIT SPC 1000:** Manufactured by PolyChem. The composition is listed as “Aqueous product containing emulsifiers, dispersants, water dilutable coupling solvent”. There is a patent (U.S. Patent 6,261,463) that appears to pertain to this product, having the following introduction:

“An effective and non-toxic oil spill dispersant combines a predominately oil-soluble surfactant (e.g., polyethylene glycol mono-oleate) with a predominately water-soluble surfactant (e.g., cocoamide) and a co-solvent for coupling a mixture of the predominately oil-soluble surfactant and the oil spill, with the predominately water-soluble surfactant. Water is included in the combination to help advance the interaction between the predominately oil-soluble surfactant and the predominately water-soluble surfactant as well as the co-solvent. The water component also helps reduce the viscosity of the dispersant to allow it to be pumped under pressure.”

<http://www.uspoly.com/disspec.html>.

| Item | CAS Registry Number | Chemical Name (TSCA Inventory)                                                                                                                   |
|------|---------------------|--------------------------------------------------------------------------------------------------------------------------------------------------|
| 1    | 61791-00-2          | Fatty acids, tall-oil, ethoxylated (Ethox TO9A)                                                                                                  |
| 2    | 61791-26-2          | Amines, tallow alkyl, ethoxylated (Ethox TAM-5)                                                                                                  |
| 3    | 68603-42-9          | Amides, coco, N,N-bis(hydroxyethyl) (Ninol 40CO)                                                                                                 |
| 4    | 84133-50-6          | Alcohols, C12-14-secondary, ethoxylated (Tergitol 19-S-5)                                                                                        |
| 5    | 68608-26-4          | Sulfonic acids, petroleum, sodium salts (Petrolnate HL, sod.)<br>(Treated as a linear alkyl sulfonate sodium salt with 25 CH <sub>2</sub> units) |
| 7    | 34590-94-8          | Dipropylene glycol monomethyl ether                                                                                                              |
| 8    | 68411-30-3          | Alkylbenzenesulfonate (C10-C13 LAS)                                                                                                              |

**Table S3:** The following non-confidential components list for DISPERSIT SPC 1000 is based on analysis of U.S. Patent 6,261,463.

Sea Brat #4: Manufactured by Alabaster Corporation. No composition information is available beyond the MSDS ([http://www.inspectapedia.com/hazmat/SEA\\_BRAT\\_4\\_MSDS.pdf](http://www.inspectapedia.com/hazmat/SEA_BRAT_4_MSDS.pdf)).

<http://www.alabastercorp.com/seabrat.htm>

Nokomis 3-AA: Manufactured by Nokomis. This is an aerial applied dispersant described as a water based colloidal surface-active agent oil spill dispersant. No further composition information is provided. No MSDS was found. <http://www.nokomis3.com/nokomis-3AA/>

Nokomis 3-F4: Manufactured by Nokomis. This is a surface applied dispersant described as a water based colloidal surface active agent oil spill dispersant. No further composition information is provided. No MSDS was found. <http://www.nokomis3.com/nokomis-3F4/>

**ZI-400:** Manufactured by ZI Chemicals. No information on composition was found, but an MSDS is available (<http://www.interchem.co.tt/ZI400MSDS.pdf>) indicating that this contains an alkali detergent (<http://www.zichemicals.com/ZI400 OSD Data.pdf>).

| Item | CAS Registry Number | Chemical Name (TSCA Inventory)                                                                                                                       |
|------|---------------------|------------------------------------------------------------------------------------------------------------------------------------------------------|
| 1    | 25155-30-0          | Alkylbenzene sulfonic acid as dodecylbenzenesulfonic acid                                                                                            |
| 2    | 9002-92-0           | Alcohol Ethoxylate as Alcohols C9-11 Ethoxylated<br>[Used Poly(oxy-1,2-ethanediyl), alpha-dodecyl-omega-hydroxy-]                                    |
| 3    | 1300-72-7           | Sodium Xylene Sulfonate                                                                                                                              |
| 4    | 68412-54-4          | Nonionic Surfactant as Polyethylene Glycol Mono-P-Nonylphenyl Ether<br>(Used poly(oxy-1,2-ethanediyl), alpha-(nonylphenyl)-omega-hydroxy-, branched) |
| 5    | Unavailable         | Organic Sulfonates (unspecified)                                                                                                                     |
| 6    | Unavailable         | Impurities (unspecified)                                                                                                                             |

**Table S4:** Components of ZI-400 obtained from Australia’s “Study of Health Outcomes in Aircraft Maintenance Personnel” available at [http://www.defence.gov.au/health/research/shoamp/docs/Lit\\_Rev\\_Final\\_version\\_Sept2\\_2003.pdf](http://www.defence.gov.au/health/research/shoamp/docs/Lit_Rev_Final_version_Sept2_2003.pdf).

**SAF-RON GOLD:** Manufactured by Saf-Ron Intl. an MSDS is available at <http://www.saf-ron.com/PDFs/MSDSSAF-RONGOLD.pdf>, but no information on composition or toxicity is provided.

## Appendix A.2: Reference Chemicals

Most reference chemicals were selected from those recommended by ICCVAM for qualifying ER and AR binding and transactivation assays[2]. All of the chemical samples listed in **Table S5** were solubilized in DMSO and shipped to laboratories performing assays.

Information on ER and AR activity derived from the ICCVAM report[2] is provided in **Table S9**.

| Chemical Name                              | Sample ID   | CASRN      | Lot Number | Date Prep. | Purity | Supplier      |
|--------------------------------------------|-------------|------------|------------|------------|--------|---------------|
| 17 $\beta$ -Estradiol                      | TX006457    | 50-28-2    | 010M0142   | 11-Jun-10  | 98     | Sigma Aldrich |
| 17 $\beta$ -Estradiol                      | TX006465    | 50-28-2    | 010M0142   | 11-Jun-10  | 98     | Sigma Aldrich |
| 17 $\beta$ -Trenbolone                     | TX006461    | 10161-33-8 | 020M1273   | 11-Jun-10  | 95     | Sigma Aldrich |
| 17 $\beta$ -Trenbolone                     | TX006467    | 10161-33-8 | 020M1273   | 11-Jun-10  | 95     | Sigma Aldrich |
| 17 $\beta$ -Trenbolone                     | TX006498    | 10161-33-8 | 71k1110    | 28-May-10  | 95     | NHEERL        |
| 2,4,5-T                                    | TX006450    | 93-76-5    | SZE7303X   | 11-Jun-10  | 99     | Sigma Aldrich |
| 4-(tert-octyl)Phenol                       | TX006455    | 140-66-9   | MKBB8667   | 11-Jun-10  | 97     | Sigma Aldrich |
| 4-Hydroxytamoxifen                         | TX006456    | 68392-35-8 | 020M4068   | 11-Jun-10  | 98     | Sigma Aldrich |
| 4-Nonylphenol (linear) (NP)                | Toxcast_596 | 104-40-5   | LB38315    | 14-Sep-06  | 98.5   | Sigma Aldrich |
| 4-Nonylphenol (branched) (NP)              | TX006468    | 84852-15-3 | 07427BJ    | 11-Jun-10  |        | Sigma Aldrich |
| 5 $\alpha$ -androstan-17 $\beta$ -ol-3-one | TX006460    | 521-18-6   | 1439199    | 11-Jun-10  | 97.5   | Sigma Aldrich |
| 5 $\alpha$ -androstan-17 $\beta$ -ol-3-one | TX006466    | 521-18-6   | 1439199    | 11-Jun-10  | 97.5   | Sigma Aldrich |
| Atrazine                                   | Toxcast_13  | 1912-24-9  | S03-2797   | 27-Jul-06  | 96.2   | EPA OPP       |
| Atrazine                                   | TX006445    | 1912-24-9  | SZE8175X   | 11-Jun-10  | 98.8   | Sigma Aldrich |
| Bicalutamide                               | TX006451    | 90357-06-5 | 010M47452  | 11-Jun-10  | 98     | Sigma Aldrich |
| Bisphenol A                                | TX006458    | 80-05-7    | MKAA2480   | 11-Jun-10  | 99     | Sigma Aldrich |
| Bisphenol A                                | TX006497    | 80-05-7    | 03105ES    | 28-May-10  | 99     | NHEERL        |
| Butyl benzyl phthalate                     | TX006444    | 85-68-7    | SZE8156X   | 11-Jun-10  | 97.6   | Sigma Aldrich |
| Butyl benzyl phthalate                     | TX006496    | 85-68-7    | 03405JH    | 28-May-10  |        | NHEERL        |
| Cyproterone acetate                        | TX006452    | 427-51-0   | 025K1270   | 11-Jun-10  | 98     | Sigma Aldrich |
| Cyproterone acetate                        | TX006495    | 427-51-0   | 81K1186    | 28-May-10  | 98     | NHEERL        |

|                      |          |             |          |           |      |               |
|----------------------|----------|-------------|----------|-----------|------|---------------|
| DDE-p,p'             | TX006454 | 72-55-9     | 11923EO  | 11-Jun-10 | 99   | Sigma Aldrich |
| DDE-p,p'             | TX006491 | 72-55-9     | D397     | 28-May-10 | 99.9 | NHEERL        |
| Di-n-butyl phthalate | TX006462 | 84-74-2     | SZE8149X | 11-Jun-10 | 99.8 | Sigma Aldrich |
| Di-n-butyl phthalate | TX006494 | 84-74-2     | 91997P5  | 28-May-10 |      | NHEERL        |
| Flutamide            | TX006459 | 13311-84-7  | 08K1294  | 11-Jun-10 |      | Sigma Aldrich |
| Flutamide            | TX006493 | 13311-84-7  | 87H1511  | 28-May-10 |      | NHEERL        |
| Genistein            | TX006453 | 446-72-0    | 098K0735 | 11-Jun-10 | 98   | Sigma Aldrich |
| Igepal CO-210 (NPE)  | TX006470 | 68412-54-4  | MKBC8907 | 11-Jun-10 |      | Sigma Aldrich |
| Linuron              | TX006446 | 330-55-2    | 5320X    | 11-Jun-10 | 99.7 | Sigma Aldrich |
| Linuron              | TX006492 | 330-55-2    | 265-44A  | 28-May-10 |      | NHEERL        |
| Methoxychlor         | TX006449 | 72-43-5     | SZE8289X | 11-Jun-10 | 98.7 | Sigma Aldrich |
| Procymidone          | TX006448 | 32809-16-8  | SZE8158X | 11-Jun-10 | 99.9 | Sigma Aldrich |
| Procymidone          | TX006490 | 32809-16-8  | 231-100A | 28-May-10 | 99   | NHEERL        |
| Tergitol NP-9 (NPE)  | TX006469 | 127087-87-0 | 07409BH  | 11-Jun-10 |      | Sigma Aldrich |
| Vinclozolin          | TX006447 | 50471-44-8  | SZE7292X | 11-Jun-10 | 99.5 | Sigma Aldrich |
| Vinclozolin          | TX006489 | 50471-44-8  | 2296X    | 28-May-10 | 99.6 | NHEERL        |

**Table S5:** Reference chemicals used for NCCT studies of dispersants.



## Appendix B – Assay Protocols

### Appendix B.1: Cis and Trans Transcription Factor Activity Reporter Gene Assays

Data on a large collection of transcription factor assays, including two ER assays, were run on the samples. This collection of a multiplexed reporter gene assays and data on 309 environmental chemicals are described by Martin et al.[3]. Attagene Inc. (RTP, NC), under contract to the U.S. EPA (Contract Number EP-W-07-049), provided multiplexed reporter transcription unit (RTU) assays (Factorial, patents pending) consisting of 48 human transcription factor DNA binding sites transfected into the HepG2 human liver hepatoma cell line as previously described[4]. In addition to the cis-acting reporter genes (CIS), a modification of the approach was used to generate a trans-system (TRANS) with a mammalian one-hybrid assay consisting of an additional 25 RTU library reporting the activity of nuclear receptor (NR) superfamily members[5]. The human ligand-binding domain of each nuclear receptor was expressed as a chimera with the yeast GAL4 DNA-binding domain that activated in trans a 5XUAS-TATA promoter, which regulated the transcription of a reporter sequence unique to each NR RTU. To ensure the specificity of detection, each individual trans-RTU system including both receptor and reporter gene was separately transfected into suspended cells followed by pooling and plating of the transfected cells prior to screening. A major difference between the CIS and TRANS system is that in CIS activities of endogenous transcription factors are measured, whereas the TRANS assay evaluates changes in activities of exogenous, chimeric NR-Gal4 proteins. Since the HepG2 cell line does not express some nuclear receptors, the CIS assay cannot be used to evaluate these targets, including the androgen receptor. A cytotoxicity assessment was performed at the higher concentrations, qualitatively, to remove confounding data from the downstream analysis process. Further assessment was performed at all concentrations by testing the samples for cytotoxicity against HepG2 cells in the MTT (3-(4,5-Dimethylthiazol-2-yl)-2,5-diphenyltetrazolium bromide) tetrazolium assay following 24 hour exposure. An LC50 was determined to further filter out data confounded by cytotoxicity. The following tables list the complete set of CIS and TRANS assays run as part of this study.

| <b>RTU Name</b> | <b>ASSAY NAME</b> | <b>Induced by Transcription Factors/ Inducers</b> | <b>Biological Pathways</b>             |
|-----------------|-------------------|---------------------------------------------------|----------------------------------------|
| AhRE            | ATG_Ahr_CIS       | AhR / Dioxin, FIC                                 | Xenobiotic response, hypoxia           |
| AP-1            | ATG_AP_1_CIS      | AP-1-like components: c-fos, c-jun / PMA          | JNK pathway, stress responses          |
| AP-2            | ATG_AP_2_CIS      | AP-2 Family                                       | Embryonic morphogenesis                |
| BRE             | ATG_BRE_CIS       | SMAD Family / BMPs                                | Osteoblast differentiation             |
| C/EBP           | ATG_C_EBP_CIS     | C/EBP Family                                      | Adipogenesis                           |
| CMV             | ATG_CMV_CIS       | Cytomegalovirus (CMV) promoter                    | Negative Control (Viral Promoter)      |
| CRE             | ATG_CRE_CIS       | CREB Family / Forskolin, cAMP                     | cAMP, cGMP, NO receptor, GPCR pathways |
| LXRE (DR4)      | ATG_DR4_LXR_CIS   | LXR $\alpha$ , $\beta$ /oxysterols                | Nuclear hormone receptor pathway       |
| RARE(DR5)       | ATG_DR5_CIS       | RAR $\alpha$ , $\beta$ , $\gamma$ / Retinoic acid | Nuclear hormone receptor pathway       |
| E-box           | ATG_E_Box_CIS     | c-Myc, USF1                                       | Cell cycle, proliferation              |
| E2F             | ATG_E2F_CIS       | E2F subfamily                                     | Cell cycle, Proliferation              |
| EGR             | ATG_EGR_CIS       | Egr subfamily/ Growth factors                     | Receptor tyrosine kinase pathway       |
| ERE             | ATG_ERE_CIS       | ER/estrogens                                      | Nuclear hormone receptor pathway       |
| Ets             | ATG_Ets_CIS       | Ets Family/ PMA                                   | MAP kinase mediated signaling          |
| FoxA            | ATG_FoxA2_CIS     | Fork Head family: FoxA                            | Hepatic specification                  |
| FoxO            | ATG_FoxO_CIS      | Fork Head Family: FoxO                            | Akt/Forkhead signaling                 |
| GATA            | ATG_GATA_CIS      | GATA Family                                       | Differentiation                        |
| GLI             | ATG_GLI_CIS       | Gli subfamily                                     | Hedgehog pathway                       |
| GRE             | ATG_GRE_CIS       | GR / Dexamethazone                                | Differentiation, inflammation          |
| HIF1 $\alpha$   | ATG_HIF1a_CIS     | HIF1 $\alpha$ / hypoxia                           | Hypoxia, angiogenesis                  |
| HNF6            | ATG_HNF6_CIS      | Tissue specific regulator: HNF6                   | Endocrine cell differentiation         |
| HSE             | ATG_HSE_CIS       | HSF Family / heat shock, geldanamycin             | Stress response, heat shock            |
| FXRE (IR1)      | ATG_IR1_CIS       | preferential binding site for FXR                 | Nuclear hormone receptor pathway       |

|                   |                   |                                                           |                                               |
|-------------------|-------------------|-----------------------------------------------------------|-----------------------------------------------|
| ISRE              | ATG_ISRE_CIS      | Interferone regulating factors: IRF1, IFR3 / Interferones | Immune responses, host defense                |
| MRE               | ATG_MRE_CIS       | MTF-1/ heavy metals                                       | Heavy metals response                         |
| Myb               | ATG_Myb_CIS       | Myb Family                                                | Hematopoietic cell differentiation            |
| Myc               | ATG_Myc_CIS       | specific to c-Myc                                         | Proliferation, apoptosis                      |
| NF-kB             | ATG_NF_kB_CIS     | Rel Family/ TNF $\alpha$ , IL-1 $\beta$ , LPS             | Immune responses, IL-1/Toll receptor pathway  |
| NFI               | ATG_NFI_CIS       | NF-1 family                                               | Drug metabolism                               |
| NRF1              | ATG_NRF1_CIS      | NFE2 subfamily: NRF1                                      | Mitochondria genesis, antioxidative responses |
| ARE               | ATG_NRF2_ARE_CIS  | NF-E2 subfamily:NRF2                                      | Antioxidative responses                       |
| Oct               | ATG_Oct_MLP_CIS   | POU domain Family: OCTs                                   | Development                                   |
| p53               | ATG_p53_CIS       | p53 family/ DNA damage                                    | Genotoxics stress responses                   |
| Pax               | ATG_Pax6_CIS      | Pax Family                                                | Development of CNS, beta cell differentiation |
| PBREM             | ATG_PBREM_CIS     | CAR/ Phenobarbital                                        | Nuclear hormone receptor pathway              |
| PPRE              | ATG_PPRE_CIS      | PPAR $\alpha$ , $\delta$ , $\gamma$ / Rosiglitazone       | Nuclear hormone receptor pathway              |
| PXRE              | ATG_PXRE_CIS      | PXR / Rifampicin                                          | Nuclear receptor pathway                      |
| RORE              | ATG_RORE_CIS      | partially specific for RORs $\alpha$ , $\beta$ , $\gamma$ | Nuclear receptor pathway                      |
| SOX               | ATG_Sox_CIS       | SOX Family                                                | Chondrogenesis                                |
| Sp1               | ATG_Sp1_CIS       | Ubiquitous transcription factor Sp1                       | Differentiation                               |
| SREBP             | ATG_SREBP_CIS     | SREBP subfamily                                           | Lipid homeostasis                             |
| STAT              | ATG_STAT3_CIS     | STAT Family / IL-6                                        | JAK pathway                                   |
| TA                | ATG_TA_CIS        | MHC2 TA promoter                                          | Negative Control (Minimal Promoter)           |
| TAL               | ATG_TAL_CIS       | TAL promoter                                              | Negative Control (Minimal Promoter)           |
| TCF/ $\beta$ -cat | ATG_TCF_b_cat_CIS | TCF-1 Family/ Wnt                                         | Cell adhesion, Wntless-Int pathway            |
| TGF $\beta$       | ATG_TGFb_CIS      | SMAD Family / TGFb                                        | Cell growth and differentiation TGFb pathway  |
| VDRE              | ATG_VDRE_CIS      | VDR/ vitamin D                                            | Nuclear receptor pathway                      |
| Xbp1              | ATG_Xbp1_CIS      | X-Box protein 1                                           | Unfolded protein response, ER stress          |

**Table S6** – Listing of CIS assays run by Attagene, including a short description of the molecular target's biological pathway.

| <b>RTU Name</b> | <b>ASSAY NAME</b> | <b>Name of Receptor (Gene Symbol)</b>                    |
|-----------------|-------------------|----------------------------------------------------------|
| AR              | ATG_AR_TRANS      | Androgen Receptor (NR3C4)                                |
| CAR             | ATG_CAR_TRANS     | Constitutive androstane receptor (NR1I3)                 |
| ERa             | ATG_ERa_TRANS     | Estrogen receptor alpha (NR3A1)                          |
| ERRa            | ATG_ERRa_TRANS    | Estrogen-related receptor alpha (NR3B1)                  |
| ERRg            | ATG_ERRg_TRANS    | Estrogen-related receptor gamma (NR3B3)                  |
| FXR             | ATG_FXR_TRANS     | Farnesoid X-activated receptor (NR1H4)                   |
| GR              | ATG_GR_TRANS      | Glucocorticoid receptor (NR3C1)                          |
| Hpa5            | ATG_Hpa5_TRANS    | Human platelet antigen 5 (negative control)              |
| LXRa            | ATG_LXRa_TRANS    | Liver X receptor alpha (NR1H3)                           |
| LXRb            | ATG_LXRb_TRANS    | Liver X receptor beta (NR1H2)                            |
| NHF4a           | ATG_HNF4a_TRANS   | Hepatocyte nuclear factor 4-alfa (NR2A1)                 |
| NURR1           | ATG_NURR1_TRANS   | Nur-related protein 1 (NR4A2)                            |
| PPARa           | ATG_PPARa_TRANS   | Peroxisome proliferator activated receptor alpha (NR1C1) |
| PPARd           | ATG_PPARd_TRANS   | Peroxisome proliferator activated receptor delta (NR1C2) |
| PPARg           | ATG_PPARg_TRANS   | Peroxisome proliferator activated receptor gamma (NR1C3) |
| PXR             | ATG_PXR_TRANS     | Pregnane X receptor (NR1I2)                              |
| RARa            | ATG_RARa_TRANS    | Retinoic acid receptor alpha (NR1B1)                     |
| RARb            | ATG_RARb_TRANS    | Retinoic acid receptor beta (NR1B2)                      |
| RARg            | ATG_RARg_TRANS    | Retinoic acid receptor gamma (NR1B3)                     |
| RORb            | ATG_RORb_TRANS    | RAR-related orphan receptor beta (NR1F2)                 |
| RORg            | ATG_RORg_TRANS    | RAR-related orphan receptor gamma (NR1F3)                |
| RXRa            | ATG_RXRa_TRANS    | Retinoid X receptor alpha (NR2B1)                        |
| RXRb            | ATG_RXRb_TRANS    | Retinoid X receptor (NR2B2)                              |
| THRa            | ATG_THRa1_TRANS   | Thyroid hormone receptor alpha (NR1A1)                   |
| VDR             | ATG_VDR_TRANS     | Vitamin D3 receptor (NR1I1)                              |

**Table S7** – Listing of TRANS assays run by Attagene

## Appendix B.2: AR beta-lactamase Assay (agonist and antagonist modes)

Overview: The androgen receptor (AR), located at chromosome Xq11-12, is an important member of nuclear hormone receptors. AR signaling plays a critical role in AR-dependent prostate cancer and other androgen related diseases. Considerable attention has been given in the past decades to the possibility of some of environmental chemicals which may contribute the endocrine disruption. Therefore, it is important to understand the effect of environmental chemicals in AR signaling pathway.

NCGC Assay Protocol Summary: Using a beta-lactamase reporter-gene under control of the AR response element, a cell-based assay [GeneBLAzer<sup>®</sup> AR-UAS-bla-GripTite<sup>™</sup> assay developed by Invitrogen] was used to measure AR ligands signaling. AR-UAS-bla-GripTite<sup>™</sup> HEK 293 cells (AR *bla* cells) were used with assay medium containing 10% dialyzed FBS, 0.1 mM NEAA and 1 mM sodium pyruvate. The assay was performed in clear bottom black Greiner 1536-well plates. R1881, a synthetic androgen agonist, was used as a positive control in the screen. Library compounds were measured for their ability to either stimulate or inhibit the reporter gene activity. Compounds were screened in a titration series in 1536-well format. The fluorescence intensity (405 nm excitation, 460/530 nm emission) was measured using an EnVision plate reader. Data was normalized relative to R1881 control (40 nM, 100%, for agonist mode and 10 nM, 0%, for antagonist mode), and DMSO only wells (basal, 0% for agonist mode and -100% for antagonist mode). Concentration-response titration points for each compound were fitted to the Hill equation yielding concentrations of half-maximal stimulation (EC<sub>50</sub>), half-maximal inhibition (IC<sub>50</sub>) and maximal response (efficacy) values.

### qHTS protocol for AR beta-lactamase assay in agonist mode

[Step] [Parameter] [Value] [Description]

1. Reagent; 6  $\mu$ L; 2000 cells/well
2. Incubation; 37°C for 5 hrs
3. Reference compounds; 23 nL; 9.1 pM to 76.7  $\mu$ M; dispersants; 23 nL; 0.00012 ppm to 1008 ppm
4. Controls (R1881 and DMSO); 23 nL,

- a. Final concentrations of R1881 of 20 nM in row AC (wells 1-24), 40 nM in row AD (wells 1-24), 80 nM in row AC (wells 25-48) and 160 nM in row AD (wells 25-48)
  - b. DMSO in row AE and AF
5. Incubation; 37°C for 16 hrs
  6. Detection reagent; 1 µL of CCF4-dye
  7. Incubation; RT for 1.5 hrs
  8. Detection; Fluorescence; Envision plate reader (PerkinElmer)

qHTS protocol for AR beta-lactamase assay in antagonist mode

[Step] [Parameter] [Value] [Description]

1. Reagent; 5 µL; 2000 cells/well
2. Incubation; 37°C for 5 hrs
3. Compounds; 23 nL; 9.1 pM to 76.7 µM; dispersants; 23 nL; 0.00012 ppm to 1008 ppm
4. DMSO Control; 23 nL,
5. Agonist (Stimulator); 1 µL; R1881 at 10nM (final) concentration
6. Incubation; 37°C for 16 hrs
7. Detection reagent; 1 µL of CCF4-dye
8. Incubation; RT for 1.5 hrs
9. Detection; Fluorescence; Envision plate reader (PerkinElmer)

Cytotoxicity Analysis: Cell viability after compound treatment was measured in these AR *bla* cells using a luciferase-coupled ATP quantitation assay (CellTiter-Glo viability assay, Promega). The change of intracellular ATP content indicates the number of metabolically competent cells after compound treatment. The cells were dispensed at 2,000 cells/5 µL/well for AR *bla* cells in 1,536-well white/solid bottom assay plates using an FRD. The cells were incubated for 5 hrs at 37°C, followed by the addition of compounds using the pin tool. The final concentration range for reference compounds was 11 pM to 92 µM, and 0.000144 ppm to 1209.8 ppm for dispersants. The assay plates were incubated for 16 hrs at 37°C, followed by the addition of 5 µL/well of CellTiter-Glo reagent. After 30 min incubation at room temperature, the

luminescence intensity of the plates was measured using a ViewLux plate reader (PerkinElmer). Data was normalized relative to DMSO only wells (0%), and tetra-n-octylammonium bromide (92  $\mu\text{M}$ , -100%). Concentration-response titration points for each compound were fitted to the Hill equation yielding concentrations of half-maximal cell death ( $\text{IC}_{50}$ ) and the associated maximal percent cell-death. Using these curve fits, a sensitive measure of cytotoxicity, twenty-percent cell-death or an  $\text{IC}_{20}$ , was calculated. These values were then used to filter out ER and AR activity at or above the cytotoxicity threshold.

### Appendix B.3: ER beta-lactamase Assay (agonist and antagonist modes)

Overview: The estrogen receptor alpha ( $ER\alpha$ ) is an important member of nuclear hormone receptors.  $ER\alpha$  plays important role in breast cancer as well as in other women's health issues. The majority of breast cancers is estrogen receptor (ER) positive and depends on estrogen for growth. There is also growing concern for some of environmental chemicals which may contribute the increasing the incidence of breast cancer. Therefore, it is important to understand the effect of environmental chemicals in  $ER\alpha$  signaling pathway.

NCGC Assay Protocol Summary: Using a beta-lactamase reporter-gene under control of the ER response element, a cell-based assay [ $ER\alpha$ -UAS-bla GripTite™ cell-Based Assay from Invitrogen] was used to measure  $ER\alpha$  signaling pathway both in agonist and antagonist modes.  $ER\alpha$ -UAS-bla-GripTite™ HEK 293 cells ( $ER\alpha$  bla cells) were used with assay medium containing 2% charcoal/dextran treated FBS, 0.1 mM NEAA and 1 mM sodium pyruvate. Cells were cultured in this assay medium overnight in the flasks before the assay. The assay was performed in clear bottom black Greiner 1536-well plates.  $17\beta$ -Estradiol was used as a positive control in the screen. Library compounds were measured for their ability to either stimulate or inhibit the reporter gene activity. Compounds were screened in a titration series in 1536-well format. The fluorescence intensity (405 nm excitation, 460/530 nm emission) was measured using an EnVision plate reader. Data was normalized relative to  $17\beta$ -Estradiol control (20 nM, 100%, for agonist mode and 0.5nM, 0%, for antagonist mode), and DMSO only wells (basal, 0% for agonist mode and -100% for antagonist mode). Concentration-response titration points for each compound were fitted to the Hill equation yielding concentrations of half-maximal stimulation ( $EC_{50}$ ), half-maximal inhibition ( $IC_{50}$ ) and maximal response (efficacy) values.

#### qHTS protocol for ER beta-lactamase assay in agonist mode

[Step] [Parameter] [Value] [Description]

1. Reagent; 6  $\mu$ L; 5000 cells/well
2. Incubation; 37°C for 5 hrs
3. Compounds; 23 nL; 9.1 pM to 76.7  $\mu$ M; dispersants; 23 nL; 0.00012 ppm to 1008 ppm



4. Controls (17 $\beta$ -Estradiol and DMSO); 23 nL
  - a. Final concentrations of 17 $\beta$ -Estradiol of 40 in row AD and 20 nM in row AE
  - b. DMSO in row AF
5. Incubation; 37°C for 18 hrs
6. Detection reagent; 1  $\mu$ L of CCF4-dye
7. Incubation; RT for 1 to 1.5 hrs
8. Detection; Fluorescence; Envision plate reader (PerkinElmer)

qHTS protocol for ER beta-lactamase assay in antagonist mode

[Step] [Parameter] [Value] [Description]

1. Reagent; 5  $\mu$ L; 5000 cells/well
2. Incubation; 37°C for 5 hrs
3. Compounds; 23 nL; 9.1 pM to 76.7  $\mu$ M; dispersants; 23 nL; 0.00012 ppm to 1008 ppm
4. DMSO Control; 23 nL
5. Agonist (Stimulator); 1 $\mu$ L; 17 $\beta$ -Estradiol at 0.5 nM (final) concentration
6. Incubation; 37°C for 18 hrs
7. Detection reagent; 1  $\mu$ L of CCF4-dye
8. Incubation; RT for 1-1.5 hrs
9. Detection; Fluorescence; Envision plate reader (PerkinElmer)

Cytotoxicity Analysis: Cell viability after compound treatment was measured in these ER *bla* cells using a luciferase-coupled ATP quantitation assay (CellTiter-Glo viability assay, Promega). The change of intracellular ATP content indicates the number of metabolically competent cells after compound treatment. The cells were dispensed at 5,000 cells/5  $\mu$ L/well for ER $\alpha$  *bla* cells in 1,536-well white/solid bottom assay plates using an FRD. The cells were incubated a 5 h at 37°C, followed by the addition of compounds using the pin tool. The final concentration range for reference compounds was 11 pM to 92  $\mu$ M, and 0.000144 ppm to 1209.8 ppm for dispersants. The assay plates were incubated for 18 hrs at 37°C, followed by the addition of 5  $\mu$ L/well of CellTiter-Glo reagent. After 30 min incubation at room temperature, the luminescence intensity of the plates was measured using a ViewLux plate reader (PerkinElmer). Data was normalized relative to DMSO only wells (0%), and tetra-n-octylammonium bromide

(92 uM, -100%). Concentration-response titration points for each compound were fitted to the Hill equation yielding concentrations of half-maximal cell death ( $IC_{50}$ ) and the associated maximal percent cell-death. Using these curve fits, a sensitive measure of cytotoxicity, twenty-percent cell-death or an  $IC_{20}$ , was calculated. These values were then used to filter out ER and AR activity at or above the cytotoxicity threshold.

## Appendix C – Curve Fitting Method

We used the concentration-response data from all assays (see Appendix B) to derive characteristic activity concentrations for each test compound, after first removing outliers and points beyond estimated thresholds of cytotoxicity. Viability assays were fit using the same methodology as stated below without cytotoxicity or outlier removal and required at least 20% cell death to achieve a characteristic (half-maximal) activity concentrations ( $AC_{50}$ ). These curve fits were further analyzed to extract a twenty-percent lethal concentration ( $LC_{20}$ ) for use as a cytotoxicity filter for associated assays.

First, in order to identify statistical outlier thresholds for each assay platform, all data were plotted to inspect data integrity and considered in the context of previous experience with the performance and dynamic range of these assays across a diverse set of chemicals[6]. For each concentration,  $d$ , outliers were defined as replicate response points,  $Y_{d_{rep}}$ , where:

$$\left| Y_{d_{rep}} \right| - \left( \left| \bar{Y}_d \right| / MAD(Y_d) \right) \geq Threshold_{assay} \quad (1)$$

Following outlier removal, the data for each assay were filtered according to the corresponding cytotoxicity measures accompanying each assay. The cytotoxicity threshold for each assay was defined as the  $LC_{20}$ . The baseline was defined as the lower (“bottom”) asymptote of the fitted cytotoxicity response.

Next,  $AC_{50}$  were calculated from the remaining concentration-response data points. Standard sigmoidal curves were fit using a 4-parameter Hill model. This model defines a response in terms of four parameters; T, B,  $AC_{50}$ , and Hillslope ( $W$ ), as in the following equation:

$$f(X) = T - \frac{T - B}{1 + \left( X / AC_{50} \right)^W} \quad (2)$$

The T and B are the upper (“top”) and lower (“bottom”) asymptotes of each assay response, respectively. The  $AC_{50}$  represents the inflection point in each response, thus providing a way to compare each compound’s potency across assays. The  $W$  parameter dictates the curve slope (response relative to concentration). The parameters were fit using the  $nls()$  function in R with the “port” algorithm (R Development Core Team, Vienna, 2010).

Along with careful inspection of all fit results,  $AC_{50}$  “hit” acceptance criteria were applied as a combination of efficacy ( $E_{\max} = \max(\bar{Y})$ ), response at the top asymptote of the sigmoidal fit (T), and goodness-of-fit ( $r^2$ ). From previous experience with each assay platform’s performance across a broad set of chemicals[6], efficacy, model response, and goodness-of-fit thresholds were applied in an assay-specific manner. For the multiplexed reporter gene assays, hits were defined as  $E_{\max} > 2$  (fold-change),  $T > 2$  (fold-change),  $r^2 > 0.5$ ; for the qHTS assays, hits were defined as  $E_{\max} > 20$  (% change),  $T > 20$  (% change),  $r^2 > 0.5$ ; for the competitive binding assays, hits were defined as  $E_{\max} > 20$  (% inhibition),  $T > 20$  (% inhibition),  $r^2 > 0.5$ . As a quantification of the statistical significance of each response pattern, we present p-values from a standard two-sample t-test (assuming unequal variances). For the t-test, the two samples were defined from the data as the group of points representing the estimated top (T) versus bottom (B) asymptotes of the fitted model.

**Appendix D – Viability Data**

| <b>ID</b> | <b>NAME</b>        | <b>TARGET</b>      | <b>AC50</b> | <b>CI (Lower)</b> | <b>CI (Upper)</b> |
|-----------|--------------------|--------------------|-------------|-------------------|-------------------|
| B         | Dispersit SPC 1000 | ORD_Menidia_96hr   | 2.9         | 2.5               | 3.2               |
| B         | Dispersit SPC 1000 | ORD_Mysid_48hr     | 12          | 10                | 14                |
| E         | Nokomis 3-F4       | ORD_Menidia_96hr   | 19          | 16                | 21                |
| D         | Nokomis 3-AA       | ORD_Menidia_96hr   | 20          | 18                | 22                |
| H         | ZI -400            | ORD_Menidia_96hr   | 21          | 18                | 23                |
| B         | Dispersit SPC 1000 | ATG_Viability      | 28          | 21                | 39                |
| D         | Nokomis 3-AA       | ORD_Mysid_48hr     | 30          | 27                | 34                |
| E         | Nokomis 3-F4       | ORD_Mysid_48hr     | 42          | 38                | 47                |
| G         | Corexit 9500       | ORD_Mysid_48hr     | 42          | 38                | 47                |
| I         | SAF-RON GOLD       | ORD_Menidia_96hr   | 44          | 41                | 47                |
| C         | Sea Brat 4         | ORD_Menidia_96hr   | 55          | 49                | 62                |
| H         | ZI -400            | ORD_Mysid_48hr     | 55          | 50                | 61                |
| C         | Sea Brat 4         | ORD_Mysid_48hr     | 65          | 57                | 74                |
| I         | SAF-RON GOLD       | ORD_Mysid_48hr     | 118         | 104               | 133               |
| G         | Corexit 9500       | ATG_Viability      | 120         | 104               | 128               |
| G         | Corexit 9500       | ORD_Menidia_96hr   | 130         | 122               | 138               |
| B         | Dispersit SPC 1000 | NCGC_AR_Viability  | 170         | 160               | 172               |
| E         | Nokomis 3-F4       | ATG_Viability      | 180         | 141               | 232               |
| D         | Nokomis 3-AA       | ATG_Viability      | 200         | 166               | 228               |
| D         | Nokomis 3-AA       | NCGC_AR_Viability  | 200         | 183               | 217               |
| D         | Nokomis 3-AA       | NCGC_ERa_Viability | 220         | 192               | 243               |
| B         | Dispersit SPC 1000 | NCGC_ERa_Viability | 260         | 236               | 283               |
| G         | Corexit 9500       | NCGC_ERa_Viability | 310         | 299               | 320               |
| H         | ZI-400             | NCGC_ERa_Viability | 340         | 300               | 381               |
| E         | Nokomis 3-F4       | NCGC_AR_Viability  | 370         | 340               | 394               |
| C         | Sea Brat 4         | ATG_Viability      | 410         | 361               | ND                |
| G         | Corexit 9500       | NCGC_AR_Viability  | 410         | 386               | 433               |
| H         | ZI-400             | ATG_Viability      | 420         | 354               | 509               |
| E         | Nokomis 3-F4       | NCGC_ERa_Viability | 430         | 391               | 476               |
| C         | Sea Brat 4         | NCGC_AR_Viability  | 560         | 515               | 603               |
| C         | Sea Brat 4         | NCGC_ERa_Viability | 580         | 516               | 638               |
| H         | ZI-400             | NCGC_AR_Viability  | 670         | 620               | 719               |
| A         | JD 2000            | ORD_Mysid_48hr     | 788         | 627               | 946               |
| I         | SAF-RON GOLD       | NCGC_AR_Viability  | 1400        | ND                | ND                |
| A         | JD 2000            | NCGC_AR_Viability  | 3200        | 3140              | 4730              |
| A         | JD 2000            | ATG_Viability      | >1000       | ND                | ND                |

|   |              |                    |       |    |    |
|---|--------------|--------------------|-------|----|----|
| I | SAF-RON GOLD | ATG_Viability      | >1000 | ND | ND |
| A | JD 2000      | NCGC_ERa_Viability | >1000 | ND | ND |
| I | SAF-RON GOLD | NCGC_ERa_Viability | >1000 | ND | ND |
| A | JD 2000      | ORD_Menidia_96hr   | >1000 | ND | ND |

**Table S8:** Viability data for the dispersants for all in vitro assays and the EPA ORD small fish and brine shrimp data[7]. All values are in ppm. ND= not determined, i.e. AC50 above highest concentration tested. The entries in the table are ordered from most toxic (top) to least toxic (bottom).

## Appendix E – Reference Chemical Data for ER Assays

This study uses a battery of ER assays, and EPA has published guidelines for validating such assays for use in the Endocrine Disruptor Screening Program (EDSP). Although the assays used here are not validated, we can compare their performance characteristics with that required for validated assays, in particular by a comparison with expected results on reference chemicals. For this report, we have only carried out this comparison for the ER assays used because no AR activity was seen in any of the dispersants.

This study used 19 chemicals that are reference chemicals for ER binding or transcriptional activation tests according to ICCVAM[2]. These are listed in **Table S9**, along with the expected results for transcriptional activation in the agonist mode, which is the activity seen for some of the dispersants. For each of the chemicals, we noted the expected activity from ICCVAM (see table legend for meaning of symbols) and where available, from the EPA OPPTS ER transactivation assay guideline[8]. AC<sub>50</sub> and EMax values for the Attagene CIS and TRANS ER assays and the NCGC ER agonist assay are also given.

If the expected activity was seen, the cell was colored green and if the expected was not seen, the cell was colored red. In cases where the expected value was equivocal, or ICCVAM and OPPTS disagreed, no color was used. For the Attagene ER $\alpha$  TRANS assay, we agree with the ICCVAM call for positive calls in 9 cases, and for negative calls in six. The assay disagrees in one positive and one negative call. The disagreeing call for Trenbolone is confusing because this chemical is positive in both including a native estrogen receptor and the estrogen receptor ligand-binding domain, as well as the cell-free competitive-binding assay (data not shown). The ERE CIS assay has one more false positive call, for Vinclozolin. So, while not getting 100% agreement with the ICCVAM calls, these assays have a high rate of agreement for both negative and positive cases. One other point to note is that the Attagene ER $\alpha$  TRANS assay produces about twice the response (EMax) as the corresponding CIS assays, while the AC<sub>50</sub> values are very similar.

| Substance                     | CASRN       | ICCVAM ER Agonist (a) | OPPTS ER Agonist | Attagene ERa TRANS |      | Attagene ERE CIS |      | NCGC ER Agonist  |      |
|-------------------------------|-------------|-----------------------|------------------|--------------------|------|------------------|------|------------------|------|
|                               |             |                       |                  | AC <sub>50</sub>   | EMax | AC <sub>50</sub> | EMax | AC <sub>50</sub> | EMax |
| 17β-Trenbolone                | 10161-33-8  | -                     |                  | 0.35               | 13   | 0.38             | 7.2  | 1.7              | 71   |
| 17β-Estradiol                 | 50-28-2     | +++                   | Pos              | 0.0025             | 20   | 0.00053          | 9.8  | 0.00029          | 110  |
| Atrazine                      | 1912-24-9   | -                     | Neg              | >100               | NA   | >100             | NA   | >100             | NA   |
| Bisphenol A                   | 80-05-7     | +                     |                  | 0.37               | 9.9  | 0.59             | 4.6  | 1.4              | 32   |
| Butyl benzyl phthalate        | 85-68-7     | ++                    |                  | 40                 | 6    | 47               | 6.1  | >100             | NA   |
| Di-n-butyl phthalate          | 84-74-2     | +                     | Neg              | 37                 | 2.1  | >100             | NA   | >100             | NA   |
| Flutamide                     | 13311-84-7  | -                     |                  | >100               | NA   | >100             | NA   | >100             | NA   |
| Linuron                       | 330-55-2    | -                     |                  | >100               | NA   | >100             | NA   | >100             | NA   |
| 4-Nonylphenol (linear) (NP)   | 104-40-5    | ++                    |                  | 11                 | 8.3  | 4.3              | 2.7  | >100             | NA   |
| DDE-p,p'                      | 72-55-9     | +                     |                  | 29                 | 9    | 48               | 4.1  | >100             | NA   |
| Methoxychlor                  | 72-43-5     | +                     |                  | 2.3                | 6.4  | 17               | 6.5  | 4.2              | 30   |
| Procymidone                   | 32809-16-8  | -                     |                  | >100               | NA   | >100             | NA   | >100             | NA   |
| Vinclozolin                   | 50471-44-8  | -                     |                  | >100               | NA   | 19               | 4.8  | >100             | NA   |
| 2,4,5-T                       | 93-76-5     | +                     |                  | >100               | NA   | >100             | NA   | >100             | NA   |
| Cyproterone acetate           | 427-51-0    | -                     |                  | >100               | NA   | >100             | NA   | 4.9              | 31   |
| Genistein                     | 446-72-0    | +                     | Pos              | 0.092              | 17   | 0.12             | 9.7  | 4.7              | 73   |
| 4-(tert-octyl)Phenol          | 140-66-9    | ++                    |                  | 2.5                | 9.8  | 3                | 5.8  | 1                | 88   |
| 4-Hydroxytamoxifen            | 68392-35-8  | +/-                   |                  | >100               | NA   | >100             | NA   | 58               | 68   |
| 5α-androstan-17β-ol-3-one     | 521-18-6    | ++                    |                  | 2.2                | 11   | 3.3              | 9.5  | 0.71             | 93   |
| 4-Nonylphenol (branched) (NP) | 84852-15-3  |                       |                  | 0.68               | 12   | 0.61             | 5.4  | 0.42             | 59   |
| Igepal CO-210 (NPE)           | 68412-54-4  |                       |                  | 2.5                | 8.5  | 14               | 6.5  | 0.49             | 87   |
| Tergitol NP-9 (NPE)           | 127087-87-0 |                       |                  | 5.7                | 4.8  | 5.6              | 2.1  | 1.2              | 63   |



**Table S9:** Comparison of activity in the ER assays used in this study against the expectations for the ICCVAM and OPPTS ER reference chemicals analyses in the study.

(a) For the ICCVAM calls, +++ Indicates that the substance was strongly active ( $EC_{50}$  value was  $<0.001 \mu\text{M}$ ); ++ indicates that the substance was moderately active ( $EC_{50}$  value was between  $0.001$  and  $0.1 \mu\text{M}$ ); + indicates that the substance was weakly active ( $EC_{50}$  value was  $>0.1 \mu\text{M}$ ), or a positive response was reported without an  $EC_{50}$  value. The  $EC_{50}$  is the effective concentration that causes half-maximal activation of the receptor. +- indicates equivocal results in the literature[2].

### Appendix F – P-value Matrix for Cytotoxicity Comparison

|                    | JD 2000 | Dispersit SPC 1000 | Sea Brat 4 | Nokomis 3-AA | Nokomis 3-F4 | Corexit 9500 | ZI-400  | SAF-RON GOLD | Bonferroni Corrected P-Value |
|--------------------|---------|--------------------|------------|--------------|--------------|--------------|---------|--------------|------------------------------|
| JD 2000            |         | 5.3E-5             | 3.6E-5     | 5.3E-9       | 0.00011      | 0.00016      | 0.00039 | 1            |                              |
| Dispersit SPC 1000 | 1.9E-6  |                    | 0.364      | 1            | 1            | 1            | 1       | 0.36         |                              |
| Sea Brat 4         | 1.3E-6  | 0.013              |            | 0.129        | 1            | 1            | 1       | 0.62         |                              |
| Nokomis 3-AA       | 1.9E-10 | 0.47               | 0.0046     |              | 1            | 1            | 1       | 0.36         |                              |
| Nokomis 3-F4       | 3.8E-6  | 0.16               | 0.11       | 0.19         |              | 1            | 1       | 0.45         |                              |
| Corexit 9500       | 5.7E-6  | 0.31               | 0.078      | 0.44         | 0.7          |              | 1       | 0.42         |                              |
| ZI-400             | 1.4E-5  | 0.054              | 0.74       | 0.054        | 0.3          | 0.21         |         | 0.59         |                              |
| SAF-RON GOLD       | 0.37    | 0.013              | 0.022      | 0.013        | 0.016        | 0.015        | 0.021   |              |                              |

Raw P-Value

**Table S10:** Statistical comparison of LC50 cytotoxicity values from cell-based assays across the eight dispersants. All dispersants combinations with a p-value less <0.05 are shaded green. All values below the diagonal are raw p-values derived from the ANOVA, while all values above the diagonal were adjusted for multiple testing.

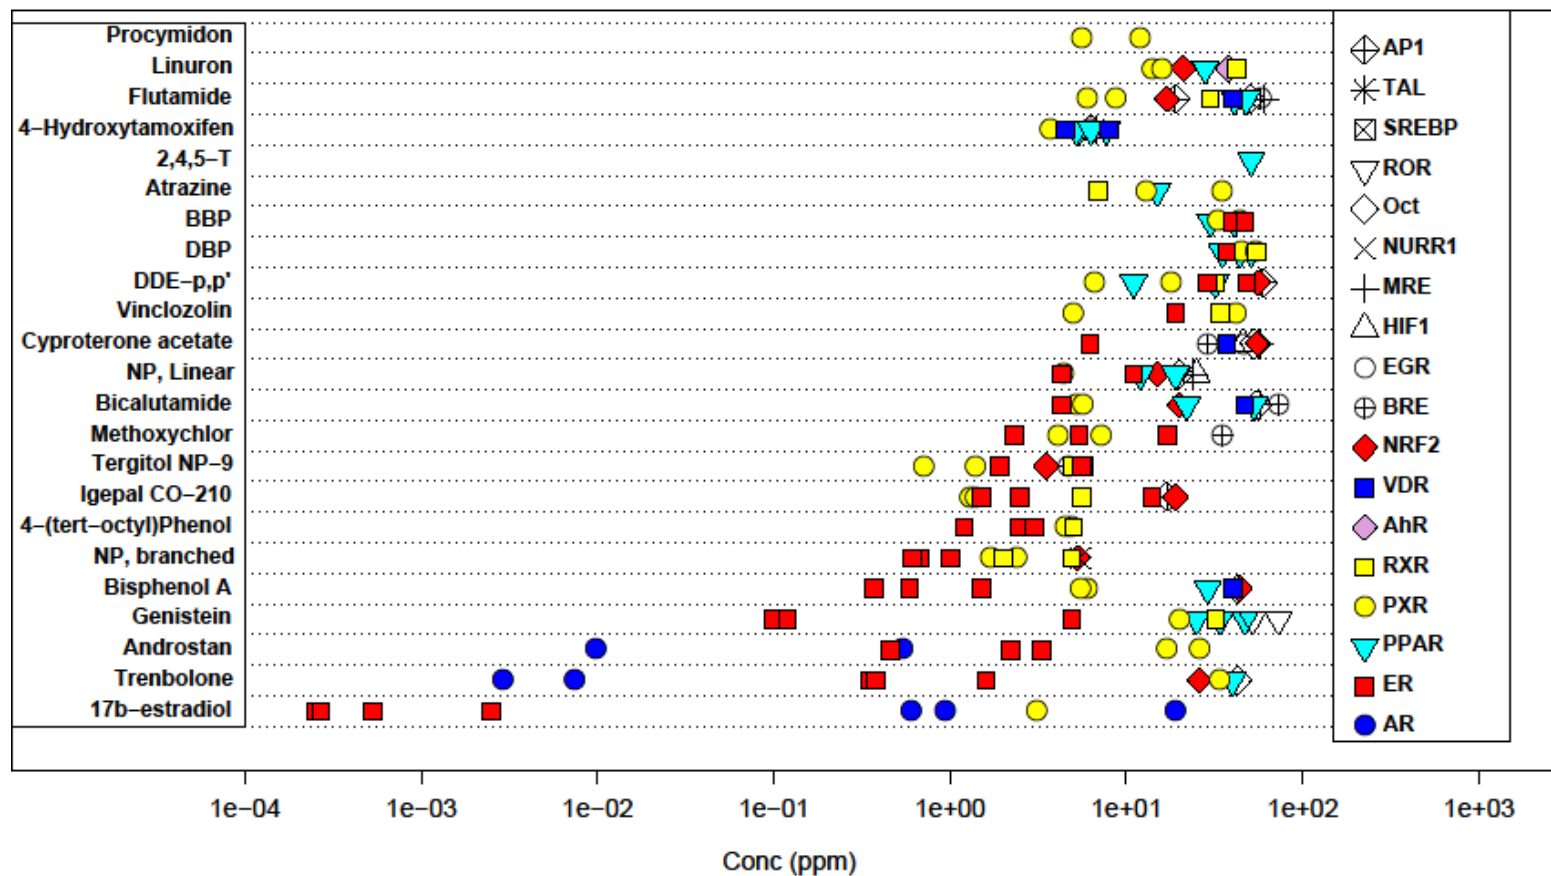

**Figure S3:** Summary plot of results for all Attagene and NCGC assays and the reference chemicals. Each horizontal band displays EC50 values for a single chemical. Multiple assays for a given gene target (e.g. PPAR $\alpha$ , PPAR $\delta$ , PPAR $\gamma$ ) are represented by a single symbol, plotted repeatedly. Symbols are the same as in **Figure 3**.

## References

1. Varadaraj, J.; Robbins, M. L.; Bock, J.; Pace, S.; MacDonald, D. Dispersion and biodegradation of oil spills on water. <http://www.iosc.org/papers/00544.pdf> (1 June),
2. ICCVAM ICCVAM Evaluation of In Vitro Test Methods for Detecting Potential Endocrine Disruptors: Estrogen Receptor and Androgen Receptor Binding and Transcriptional Activation Assays. [http://iccvam.niehs.nih.gov/docs/endo\\_docs/EDAddendFinal.pdf](http://iccvam.niehs.nih.gov/docs/endo_docs/EDAddendFinal.pdf) (15 April),
3. Martin, M. T.; Dix, D. J.; Judson, R. S.; Kavlock, R. J.; Reif, D. M.; Richard, A. M.; Rotroff, D. M.; Romanov, S.; Medvedev, A.; Poltoratskaya, N.; Gambarian, M.; Moeser, M.; Makarov, S. S.; Houck, K. A., Impact of environmental chemicals on key transcription regulators and correlation to toxicity end points within EPA's ToxCast program. *Chem Res Toxicol* **2010**, *23*, (3), 578-90.
4. Romanov, S.; Medvedev, A.; Gambarian, M.; Poltoratskaya, N.; Moeser, M.; Medvedeva, L.; Diatchenko, L.; Makarov, S., Homogeneous reporter system enables quantitative functional assessment of multiple transcription factors. *Nat Methods* **2008**, *5*, (3), 253-60.
5. Medvedev A., M. M., Poltoratskaya N., Gambarian M., Medvedeva L., Gambarian M., Martsen E., Romanov S., and Makarov S.S., Global functional profiling of nuclear receptor ligands. **In Preparation.**
6. Judson, R. S.; Houck, K. A.; Kavlock, R. J.; Knudsen, T. B.; Martin, M. T.; Mortensen, H. M.; Reif, D. M.; Rotroff, D. M.; Shah, I.; Richard, A. M.; Dix, D. J., In Vitro Screening of Environmental Chemicals for Targeted Testing Prioritization: The ToxCast Project. *Environ Health Perspect* **2010**, *118*, (4), 485-92.
7. Hemmer, M. J. B., M. G.; Greene, R. M., Comparative Toxicity of Eight Oil Dispersant Products on Standard Aquatic Species. *TBD* (**30 June**).
8. U.S. EPA OCSPP Harmonized Test Guidelines Series 890 - Endocrine Disruptor Screening Program Test Guidelines. [http://www.epa.gov/ocspp/pubs/frs/publications/Test\\_Guidelines/series890.htm](http://www.epa.gov/ocspp/pubs/frs/publications/Test_Guidelines/series890.htm) (11-June),
